# Supplementary material for: Transcriptome Insights into Candidate Genes of the SWEET Family and Carotenoid Biosynthesis during Fruit Growth and Development in Prunus salicina ‘Huangguan’
Source: MDPI journal article supplement (doi:10.3390/plants12193513), 2023-10-09
Supplement: s1 [file s1]

Supplementary Materials

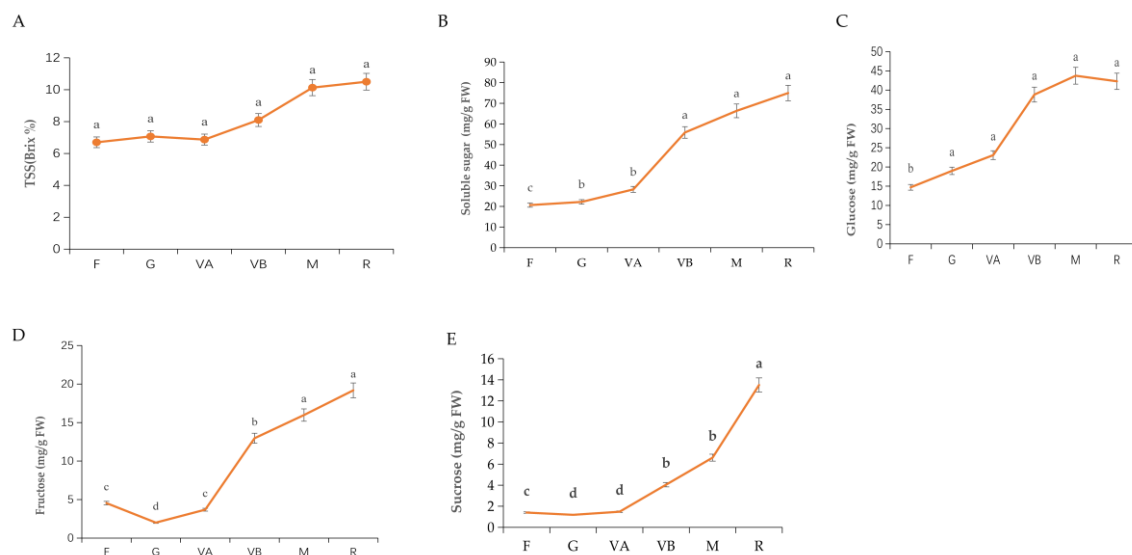

**Figure S1.** The soluble sugars concentrations in plum during fruit development stages. (A) Concentrations of TSS during plum fruit development, (B) Concentrations of soluble sugar during plum fruit development, (C) Concentrations of glucose during plum fruit development, (D) Concentrations of fructose during plum fruit development, and (E) Concentrations of sucrose during plum fruit development. All statistical differences displayed by letter were determined by ANOVA and Tukey test ( $P < 0.05$ ).

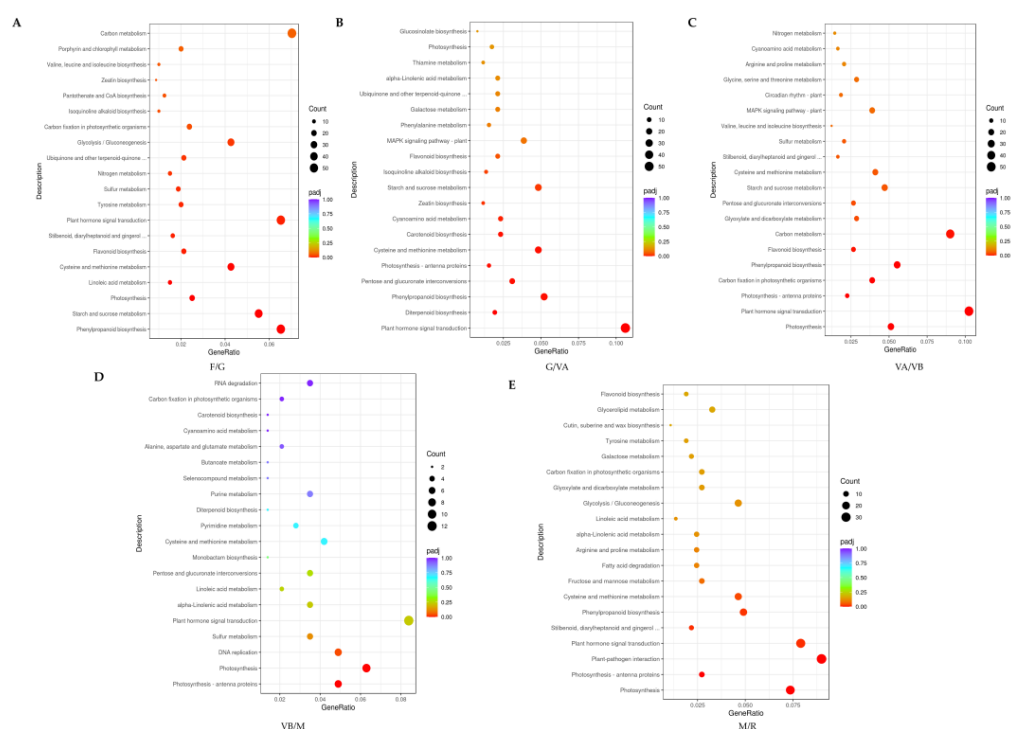

**Figure S2.** Top 20 enriched KEGG pathways of DEGs at different developmental stages. (A) Scatterplot of enriched KEGG pathway between F and G stage, (B) Scatterplot of enriched KEGG pathway

between G and VA stage, (C) Scatterplot of enriched KEGG pathway between VA and VB stage, (D) Scatterplot of enriched KEGG pathway between VB and M stage, (E) Scatterplot of enriched KEGG pathway between M and R stage.

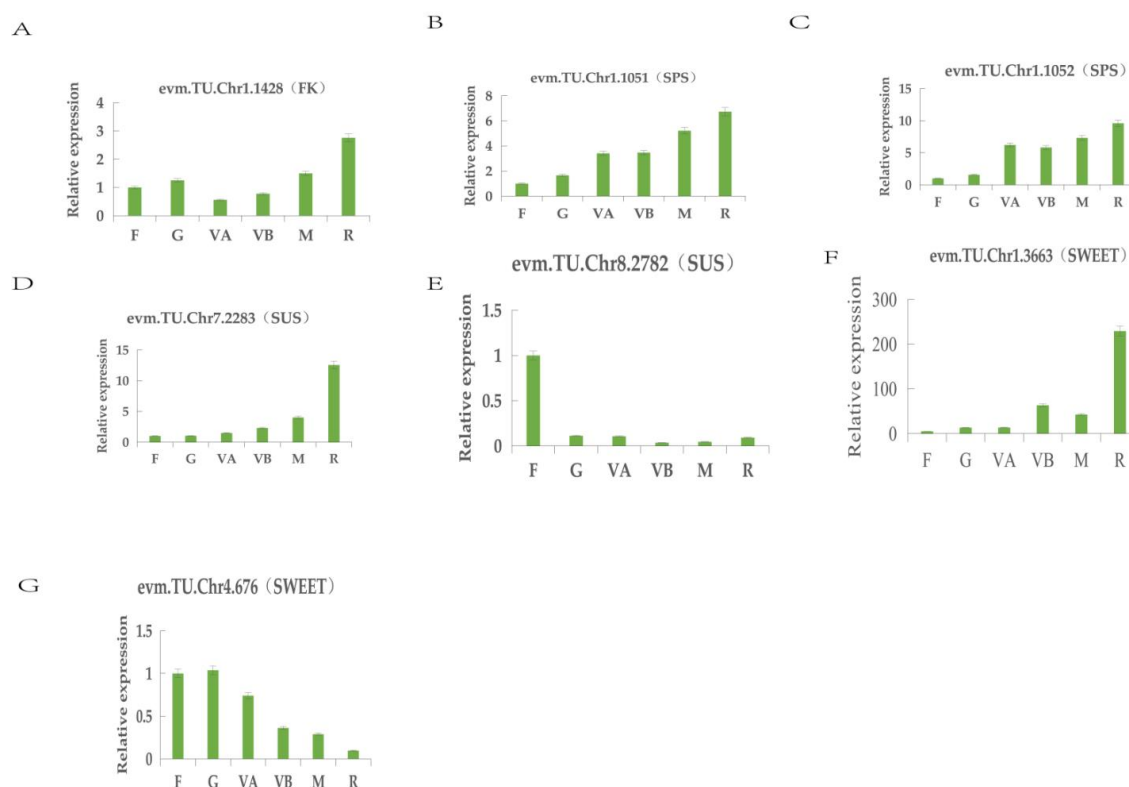

**Figure S3.** Quantitative validation of DEGs associated with sugar metabolism. (A) evm.TU.Chr1.1428 (*FK*) gene expression in different fruit development stage, (B) evm.TU.Chr1.1051 (*SPS*) gene expression in different fruit development stage, (C) evm.TU.Chr1.1052 (*SPS*) gene expression in different fruit development stage, (D) evm.TU.Chr7.2283 (*SUS*) gene expression in different fruit development stage, (E) evm.TU.Chr7.2282 (*SUS*) gene expression in different fruit development stage, (F) evm.TU.Chr4.676 (*SWEET*) gene expression in different fruit development stage, (G) evm.TU.Chr1.3363 (*SWEET*) gene expression in different fruit development stage.

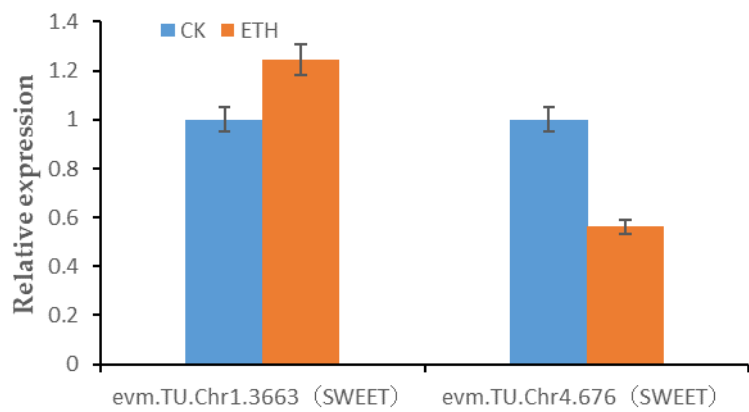

**Figure S4.** Expression analysis of the *SWEET* gene in ethylene-treated fruits.

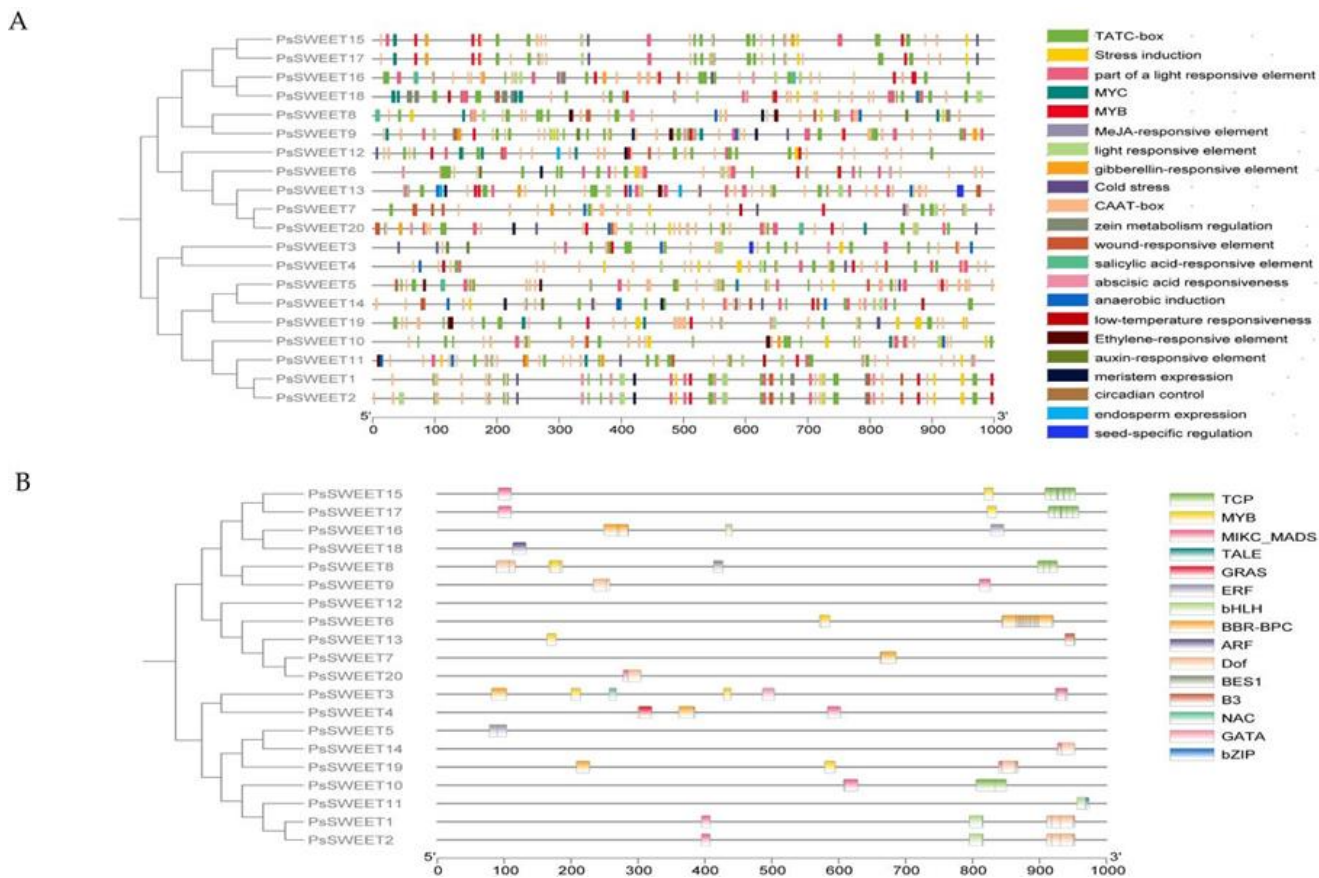

**Figure S5.** Analysis of promoter cis-acting elements and promoter transcription binding sites of the *PsSWEET* gene family. (A) cis-acting elements analysis of *PsSWEET* promoters, (B) promoter transcription binding sites analysis of *PsSWEET* gene family.

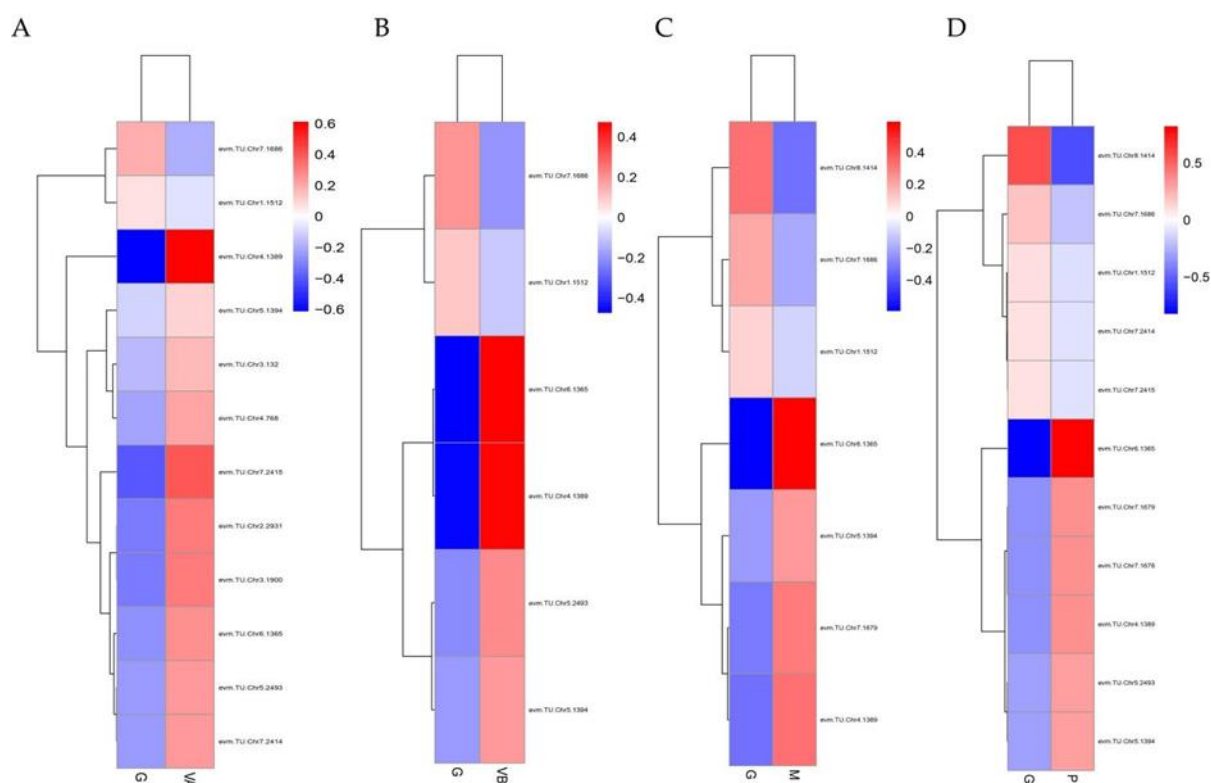

**Figure S6.** Hierarchical clustering of DEGs in G and VA, VB, M, P stage of plum, respectively. (A) DEGs between G and VA stage, (B) DEGs between G and VB stage, (C) DEGs between G and M stage, (D) DEGs between G and P stage. evm.TU.Chr2.2931(*bHY*), beta-carotene hydroxylase; evm.TU.Chr3.132/evm.TU.Chr3.1900 (*PSY*), phytoene synthase-like; evm.TU.Chr4.768/evm.TU.Chr4.1389 (*NCED2/NCED1*), 9-cis-epoxycarotenoid dioxygenase; evm.TU.Chr6.1365 (*CCS*), capsanthin/capsorubin synthase; evm.TU.Chr3.1900 (*PSY*), phytoene synthase; evm.TU.Chr5.2493/evm.TU.Chr7.1686/evm.TU.Chr1.1512 (*CYP707A1/CYP707A2/CYP707A1*), avium abscisic acid 8'-hydroxylase 1-like; evm.TU.Chr7.2415/evm.TU.Chr7.2414 (*LCY*), lycopene epsilon cyclase; evm.TU.Chr5.1394 (*BHYD*), beta-carotene hydroxylases.

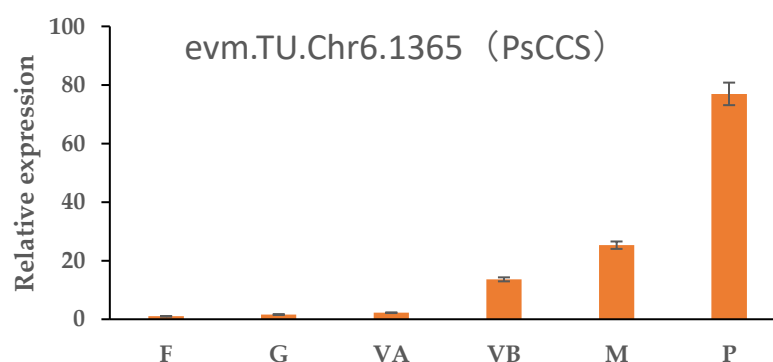

**Figure S7.** qRT-PCR analysis of the level of expression of capsanthin / capsorubin synthase in fruits at different stages of growth and development.

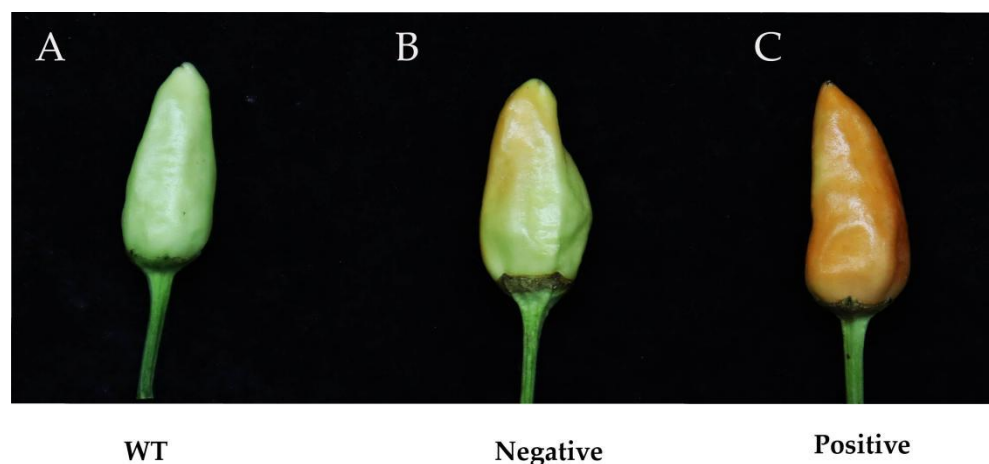

**Figure S8.** Phenotypic observations of transient overexpression of the *PsCCS* gene in chilli peppers. (A) Control of wild type, (B) Injection of empty plasmid strains as negative, (C) Injection of strains containing the *PsCCS* gene as positive.

**Table S1.** List of gene-specific primers used for real-time quantitative PCR expression analysis.

|              | Name                              | Forward primer (5' to 3')                | Reverse primer (5' to 3')                 | Source     |
|--------------|-----------------------------------|------------------------------------------|-------------------------------------------|------------|
| qRT-PCR      | evm.TU.Chr1.1428 (FK)             | GATTTTGGTTATGTGCTC                       | TTTACAAGTGAATAA-GCC                       | This study |
|              | evm.TU.Chr1.1051 (SPS)            | CCTTTTCAGCTCATAGTGA<br>T                 | CTAGCCCAATTCTCCAT<br>C                    | This study |
|              | evm.TU.Chr1.1052 (SPS)            | GGTGGATTTAGAT-TACCG                      | TCATTGAAAGAA-GCAACC                       | This study |
|              | evm.TU.Chr7.2283 (SUS)            | TAAGCGTATTAA-GCAACAGG                    | AACACGAAGAA-TATGTG                        | This study |
|              | evm.TU.Chr8.2782 (SUS)            | CTTATAGCCATGAA-TAATGC                    | TTCCATGAACAACTCGG<br>TA                   | This study |
|              | evm.TU.Chr1.3663 (SWEET)          | TTCGGAAGTGTAA-TAGAAACC                   | CCACGTTTCATAAAAC-CAA                      | This study |
|              | evm.TU.Chr4.676 (SWEET)           | CAATTCTCTG-GATTGCCTT                     | GCCACTAGTATAATAC-CAGTC                    | This study |
|              | CAC                               | GGGATACGCTACAA-GAAGAATGAG                | CTTACACTCTGGCAT-ACCACTCAA                 | [2]        |
|              | evm.TU.Chr6.1365 (CCS)            | AGCAAGTGTACACAG-CATGGCATT                | GCAGGCTCTCAAACCTCA<br>TCAACCC             | This study |
|              | Ubi gene (GeneBank no:AY486137.1) | GAGCAGTGGAGTCCAG-CATTAAACC               | TTCTGAGTCCAGCTAC-GAGCAGTG                 | This study |
| Gene cloning | evm.TU.Chr6.1365 (CCS)            | TCTGCAACATCTA-GAATGGG-TACTCTTCTGAGGCTATT | TGTCAC-TTCGAGCTCTTAGATA-TAATATTGTTTTGCTTC | This study |

**Table S2.** Protein physico-chemical properties of all PsSWEET genes.

| Gene name | Gene ID          | Number of amino acids | Molecular weight (kD) | PI   | Instability index | Aliphatic index | GRAVY | Signal peptide | Number of Transmembrane domains | Subcellular localization |
|-----------|------------------|-----------------------|-----------------------|------|-------------------|-----------------|-------|----------------|---------------------------------|--------------------------|
| PoSWEET1  | evm.TU.Chr1.3629 | 282                   | 31.38                 | 8.34 | 35.97             | 113.69          | 0.66  | YES            | 7                               | Cell membrane            |
| PoSWEET2  | evm.TU.Chr1.3663 | 282                   | 31.38                 | 8.34 | 35.97             | 113.69          | 0.66  | YES            | 7                               | Cell membrane            |
| PoSWEET3  | evm.TU.Chr1.4665 | 252                   | 27.77                 | 7.77 | 41.62             | 116.87          | 0.712 | YES            | 7                               | Cell membrane            |
| PoSWEET4  | evm.TU.Chr2.1311 | 243                   | 26.85                 | 9.16 | 41.07             | 127.2           | 0.804 | YES            | 7                               | Cell membrane            |
| PoSWEET5  | evm.TU.Chr2.2409 | 147                   | 16.58                 | 9.6  | 35.84             | 126.6           | 0.758 | YES            | 4                               | Chloroplast              |
| PoSWEET6  | evm.TU.Chr3.2937 | 226                   | 24.85                 | 9.07 | 33.35             | 106.15          | 0.478 | NO             | 5                               | Cell membrane            |
| PoSWEET7  | evm.TU.Chr3.333  | 133                   | 15.21                 | 8.69 | 38.16             | 130.3           | 0.807 | YES            | 4                               | Cell membrane            |
| PoSWEET8  | evm.TU.Chr4.1434 | 235                   | 26.43                 | 8.63 | 43.66             | 120.72          | 0.815 | NO             | 7                               | Cell membrane            |
| PoSWEET9  | evm.TU.Chr4.676  | 235                   | 25.95                 | 9    | 36.78             | 121.91          | 0.91  | NO             | 7                               | Cell membrane            |
| PoSWEET10 | evm.TU.Chr5.1013 | 293                   | 33.08                 | 5.97 | 41.93             | 126.38          | 0.742 | YES            | 7                               | Cell membrane            |
| PoSWEET11 | evm.TU.Chr5.1014 | 290                   | 32.94                 | 8.06 | 42.67             | 110.86          | 0.516 | NO             | 6                               | Cell membrane            |
| PoSWEET12 | evm.TU.Chr5.1208 | 253                   | 28.02                 | 9.3  | 38.04             | 134.07          | 0.841 | NO             | 7                               | Cell membrane            |
| PoSWEET13 | evm.TU.Chr5.728  | 182                   | 20.77                 | 9.23 | 60.98             | 133.74          | 0.903 | NO             | 5                               | Cell membrane            |
| PoSWEET14 | evm.TU.Chr6.3661 | 273                   | 30.89                 | 9.55 | 39.73             | 104.98          | 0.514 | YES            | 7                               | Cell membrane            |
| PoSWEET15 | evm.TU.Chr8.154  | 288                   | 31.34                 | 9.65 | 41.32             | 113.44          | 0.793 | YES            | 8                               | Cell membrane            |
| PoSWEET16 | evm.TU.Chr8.155  | 141                   | 15.82                 | 9.83 | 36.48             | 123.83          | 0.469 | NO             | 3                               | Cell membrane            |
| PoSWEET17 | evm.TU.Chr8.220  | 288                   | 31.34                 | 9.65 | 41.32             | 113.44          | 0.791 | YES            | 8                               | Cell membrane            |
| PoSWEET18 | evm.TU.Chr8.221  | 105                   | 11.90                 | 9.74 | 44.56             | 122.67          | 0.25  | NO             | 2                               | Cell membrane            |
| PoSWEET19 | evm.TU.Chr8.2618 | 284                   | 31.60                 | 8.57 | 39.81             | 111.27          | 0.693 | YES            | 6                               | Cell membrane            |
| PoSWEET20 | evm.TU.Chr8.961  | 106                   | 11.96                 | 5.51 | 35.2              | 147.92          | 0.885 | YES            | 3                               | Chloroplast              |

evm.TU.Chr6.1365 (CCS) nucleotide sequence: 1503bp

ATGGGTACTCTTCTGAGGCTATTTTCACCACCACCACCAGCAACCCAGAG-  
CAGCCAATTTTTTCATTCAATCCTCCATTTTCATTTCCAAGAACCTGTGGCACATCTTCGAGAAATACTCCTTCCAAAGCACAGAGCAGCGAATGTG  
GAAATTTTCTTGATTTAAAACCGGTGGCAAAACCTGAATTCTTAGATTTCAACAT-  
ACCCCGGTTTGACACATCCACTAGGTCTTCCTTAGACGTGATCATTCATTGGCACTGGCCCTGCCGGGCTTCGCCTTGACAGAGCAAGTGTACAGCATGGC  
ATTAAGGTATGTTGTGTTGATCCTTCACCGCAATCTTTGTGGCCAAATACCTATTCTGTTT-  
GGGTTGATGAGTTTGAGAGCCTGCAGCTTGAGAGTTGCTTAGAAAAACATGGCCTAGGTCTTGCTTTTATATTGATGAAGACAATGTCAAGTATATAGA  
CCGCCCTTTCGGTCGAATTAGCAGGAAGAAATTCAAGACTTTGCTAATGGA-  
GAGGTGCCTCTCTAATGATGTCAAGTTTCATAAGGCCAAGGTTTTGAAAATTGAGCACCAAGAGTTTGAATCTTCGATATTCTGTGACGATGGCAATGAG  
CTCAAGGCAAGCCTAATTGTTGATGCTAGTGGGTTTGCAAGCACTTTACGGAG-  
TATGACAAACCAAGGAACCATGGCTATCAGACTGGCCATGGCATTGCTGAAGTGGATTTTCACCCTTTTGAAGTTGGATAAGGTTGTTTCAAGTTGGATTG  
GAGAGACTCCCATCTCAGAAATGAGCCTTCAATGCTCACTACAAATTCAAGAT-  
TTCCAACTTTTCTCTTTGCCATGCCATTTGATTCAAGCCTAATATATTTAATGGAACTTCATTGGTTAGTAGGCCAGTGCTGCCTTATGAGGAGGTGAAG  
AAGAGAATGGTTGCAAGGCTAAGGCATTTGGGAATTAGAGTGAAGAGGGTTTTGGAGGCTGA-  
GAAGTGTGTTGATCCCAATGGGAGGTCCTCTTCCTCGGATGTCTCAAGAAGTATGGCTATGGGAGGAAGTTCCGGGCTTGTCATCCTTCAGCCGGGTAC  
ATGGTGGCGTCAGCCATGGCTCTAGCCCCGGTGCTAGCCGAGGCCATTGTGCAGTGCCTT-  
GGCTCGACCCCAATGATCCGAGGGCAGCCACTTTATGATAGAGTGTGGAAGGGGCTGTGGCCAATTGAGAGGAGATGTGTTAGGGAGTTTTACTCTTTTG  
GGATGGAGACTTTGTTGACGCTTGATCTGAATGAGACTCGAAGGTTCTTTGATGCTTTCTTT-  
GACTTGGATCCGTATTACTTGCACGGCTATCTTTCAAGGTTGTCCCAACAGAGCTTGCCCTTTTCAGTTTATCTATGTTTGGCAATGCCTCTGTTTCAT  
CTAGAGTTGAACTTCTTACAAAGTCTGCTGTACCCTTCGTTAAAATGATAGGTAATCTAGCACTTGAAGCAAAACAATATTATATCTAA
